# Supplementary material for: Ionic Liquids Enhanced Alkynyl Schiff Bases Derivatives of Fipronil Synthesis and Their Cytotoxicity Studies
Source: PubMed Central journal article supplement (PMC6767227; doi:10.3390/molecules24183223), 2019-09-04
Supplement: molecules-24-03223-s001.pdf [file molecules-24-03223-s001.pdf]

# Ionic Liquids Enhanced Alkynyl Schiff Bases Derivatives of Fipronil Synthesis and Their Cytotoxicity Studies

Xiu Liu<sup>1,2,\*</sup>, Linya Huang<sup>1</sup>, Hongjun Chen<sup>3</sup>, Na Li<sup>2</sup>, Chao Yan<sup>2</sup>, Chenzhong Jin<sup>1</sup>, Hanhong Xu<sup>2\*</sup>

<sup>1</sup> Key Laboratory of Pesticide Harmless Application, Collaborative Innovation Center for Field Weeds Control (CICFWC) of Hunan Province, Hunan University of Humanities, Science and Technology, Loudi, 417000, P. R. China; 1436431145@qq.com (L.H.); 532479626@qq.com (C.J.);

<sup>2</sup> Key Laboratory of Natural Pesticide and Chemical Biology, Ministry of Education, South China Agricultural University, Guangzhou 510642, P. R. China; 25269893@qq.com (N.L.); 79645713@qq.com (C.Y.);

<sup>3</sup> Hunan Provincial Key Laboratory of Fine Ceramics and Powder Materials, School of Materials and Environmental Engineering, Hunan University of Humanities, Science and Technology, Loudi, 417000, P. R. China; hongjunchen@hnu.edu.cn (H.C.);

\* Correspondence: liuxiu841027@163.com (X.L.); hhxu@scau.edu.cn (H.X.); Tel.: +86-20-8528-5127 (H.X.)

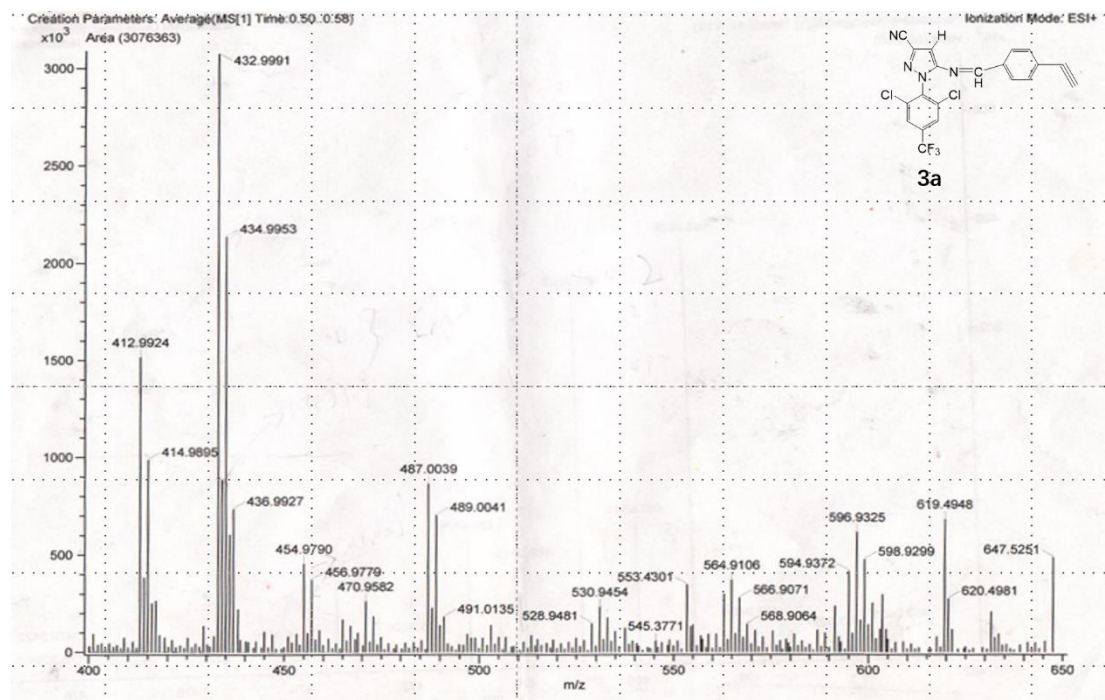

**Figure S1.** ESI-HRMS spectrum of 1-(2,6-dichloro-4-(trifluoromethyl)phenyl)-5-(4-ethynylbenzylideneamino)-1H-pyrazole-3-carbonitrile (**3a**).

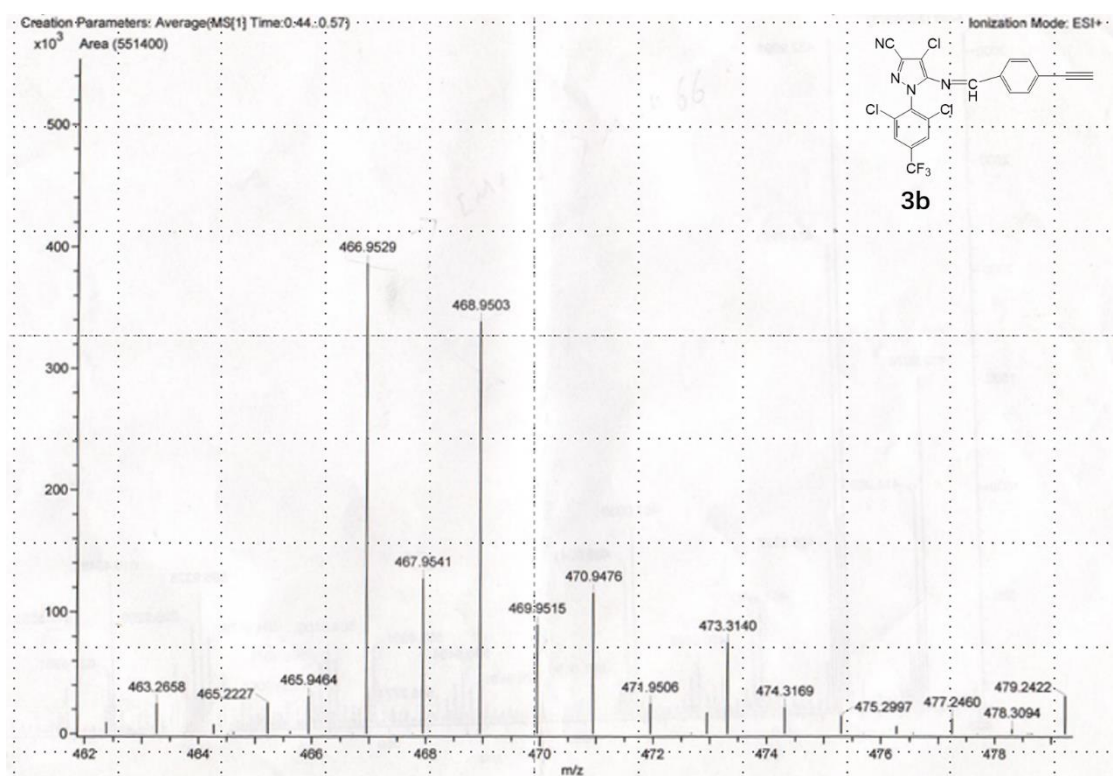

**Figure S2.** ESI-HRMS spectrum of 4-chloro-1-(2,6-dichloro-4-(trifluoromethyl)phenyl)-5-(4-ethynylbenzylidene-amino)-1H-pyrazole-3-carbonitrile (**3b**).

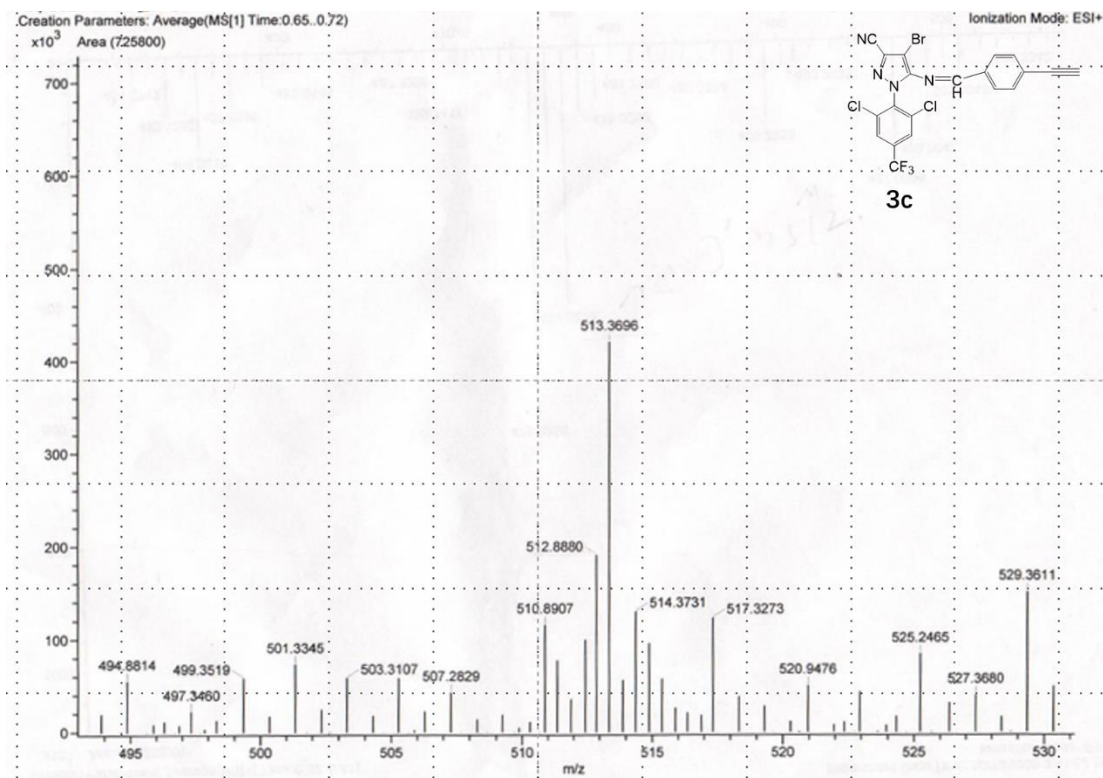

**Figure S3.** ESI-HRMS spectrum of 4-bromo-1-(2,6-dichloro-4-(trifluoromethyl)phenyl)-5-(4-ethynylbenzylidene-amino)-1H-pyrazole-3-carbonitrile (**3c**).

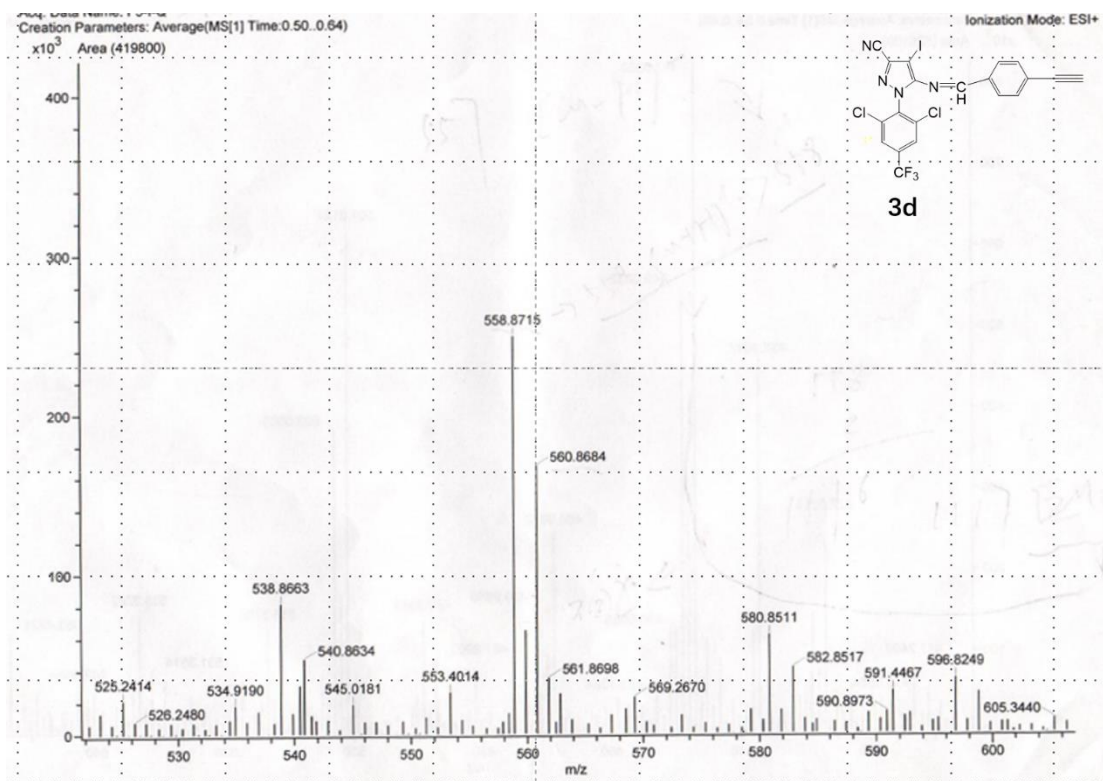

**Figure S4.** ESI-HRMS spectrum of 4-iodo-1-(2,6-dichloro-4-(trifluoromethyl)phenyl)-5-(4-ethynylbenzylidene-amino)-1H-pyrazole-3-carbonitrile (**3d**).

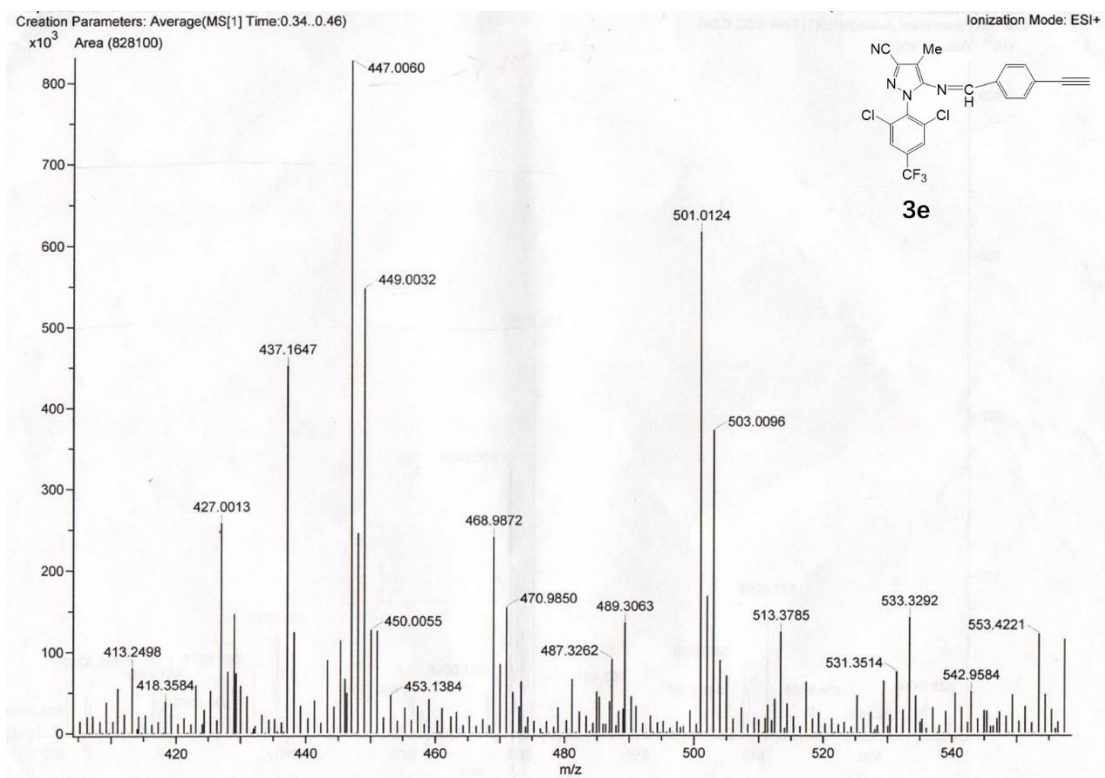

**Figure S5.** ESI-HRMS spectrum of 1-(2,6-dichloro-4-(trifluoromethyl)phenyl)-5-(4-ethynylbenzylideneamino)-4-methyl-1H-pyrazole-3-carbonitrile (**3e**).

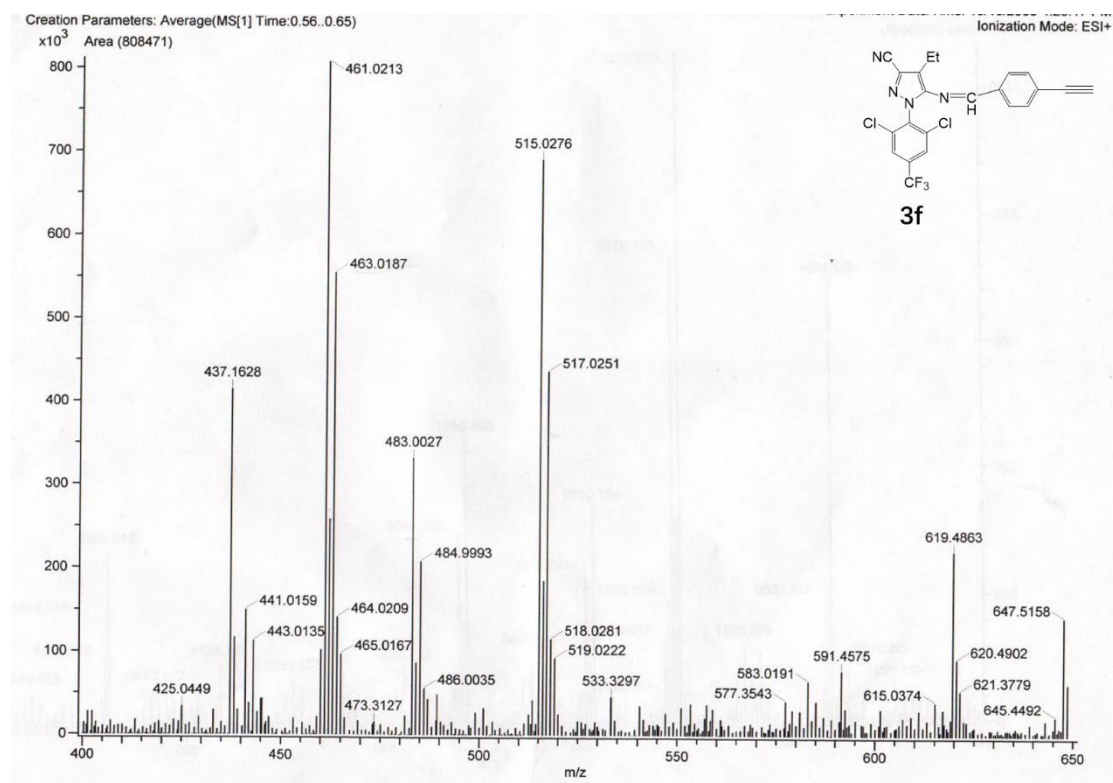

**Figure S6.** ESI-HRMS spectrum of 1-(2,6-dichloro-4-(trifluoromethyl)phenyl)-5-(4-ethynylbenzylideneamino)-4-ethyl-1H-pyrazole-3-carbonitrile (**3f**).

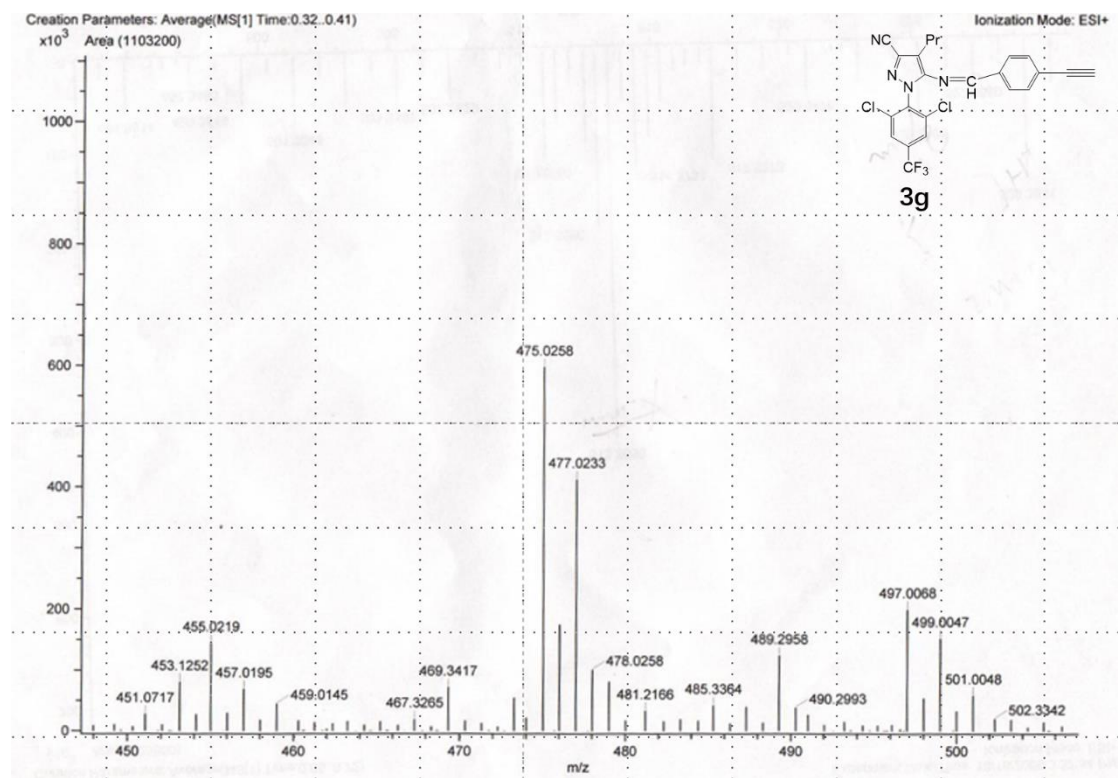

**Figure S7.** ESI-HRMS spectrum of 1-(2,6-dichloro-4-(trifluoromethyl)phenyl)-5-(4-ethynylbenzylideneamino)-4-propyl-1H-pyrazole-3-carbonitrile (**3g**).



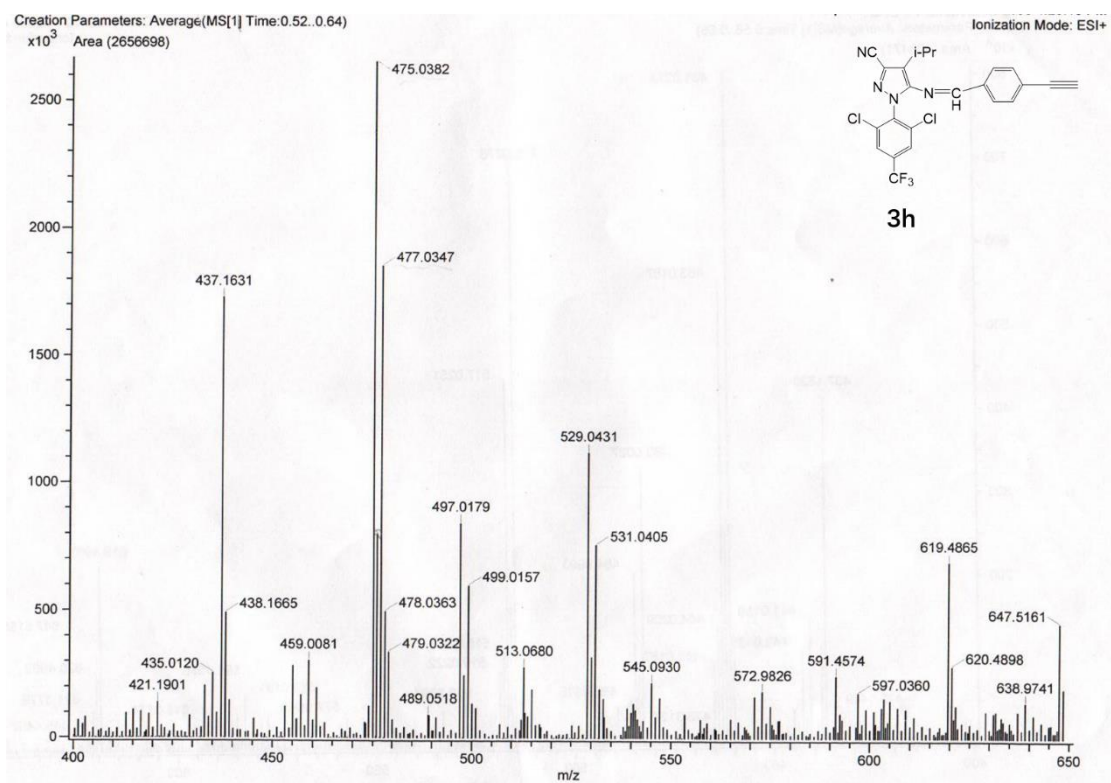

**Figure S8.** ESI-HRMS spectrum of 1-(2,6-dichloro-4-(trifluoromethyl)phenyl)-5-(4-ethynylbenzylideneamino)-4-isopropyl-1H-pyrazole -3-carbonitrile (**3h**).

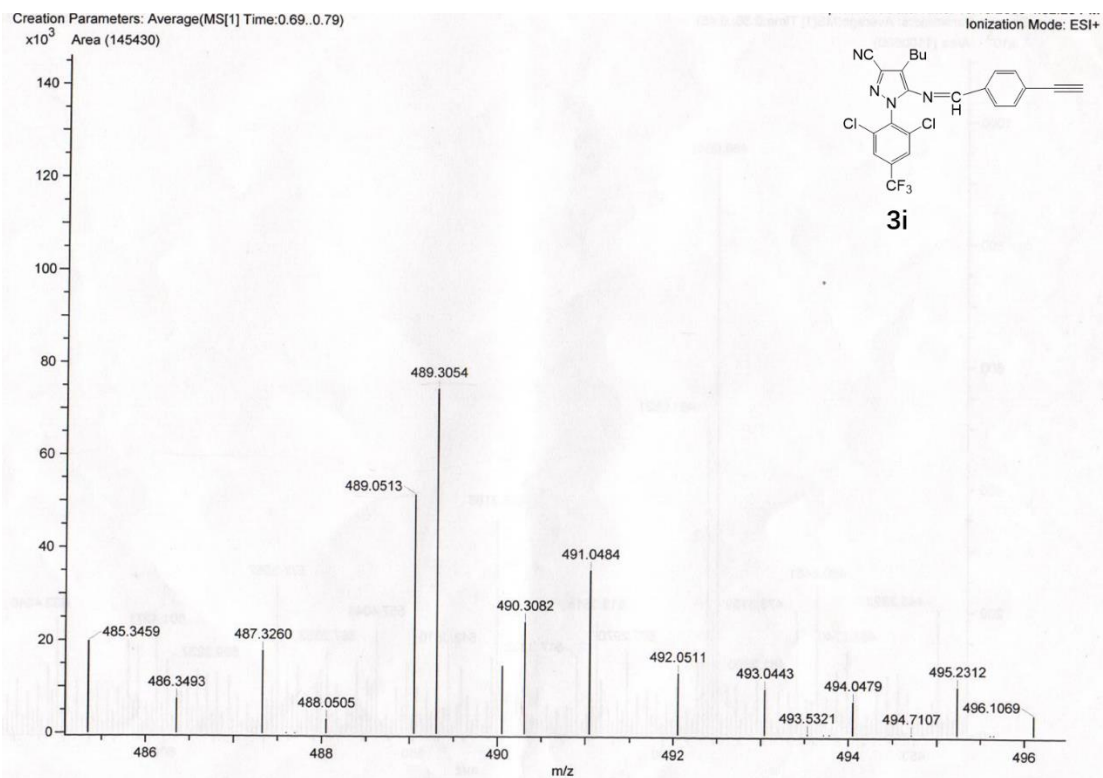

**Figure S9.** ESI-HRMS spectrum of 1-(2,6-dichloro-4-(trifluoromethyl)phenyl)-5-(4-ethynylbenzylideneamino)-4-butyl-1H-pyrazole -3-carbonitrile (**3i**).

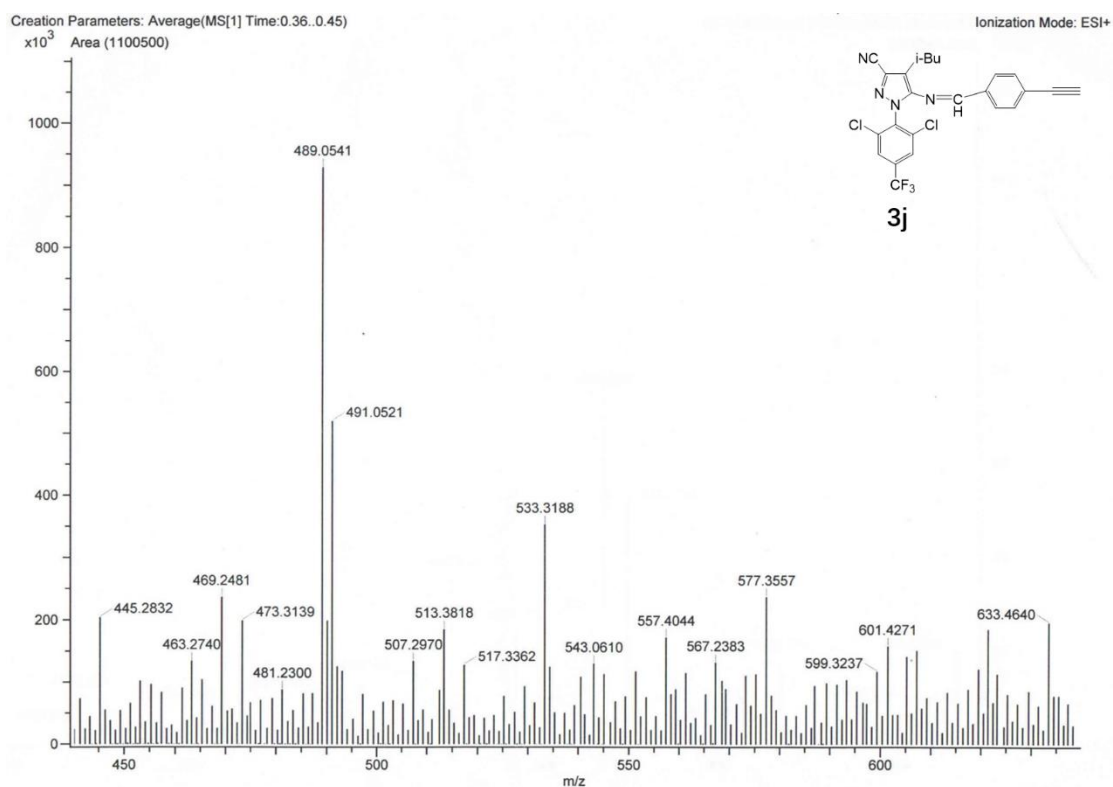

**Figure S10.** ESI-HRMS spectrum of 1-(2,6-dichloro-4-(trifluoromethyl)phenyl)-5-(4-ethynylbenzylideneamino)-4-isobutyl-1H-pyrazole-3-carbonitrile (**3j**).

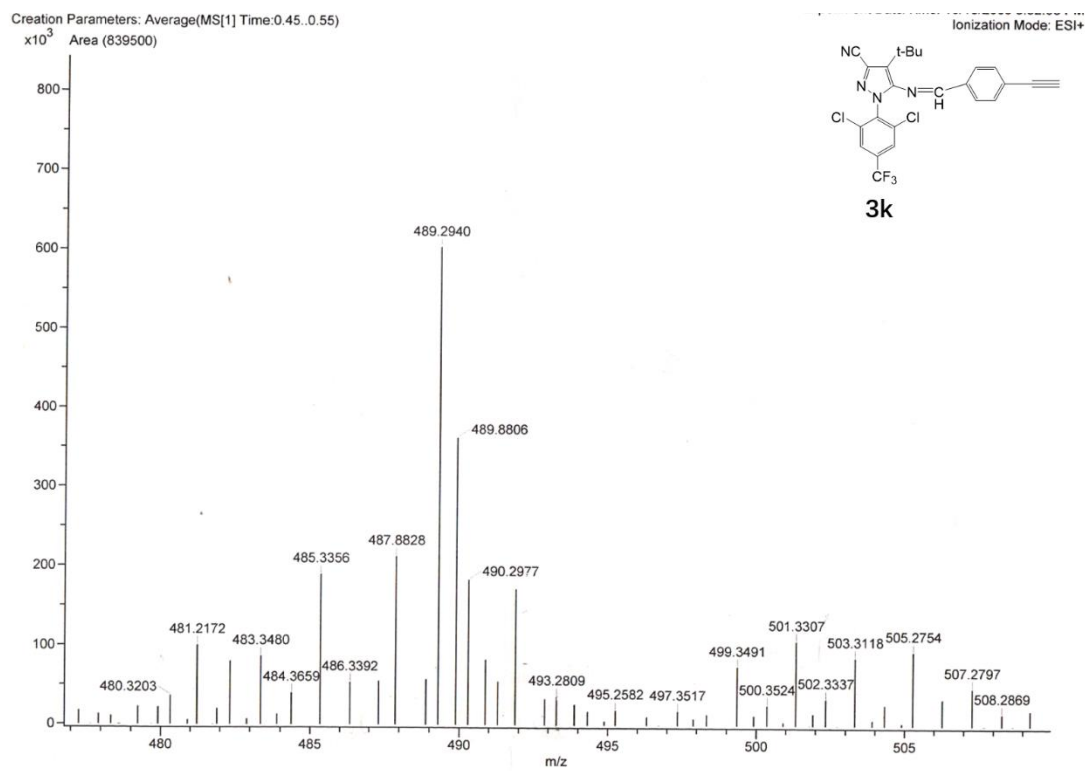

**Figure S11.** ESI-HRMS spectrum of 1-(2,6-dichloro-4-(trifluoromethyl)phenyl)-5-(4-ethynylbenzylideneamino)-4-tert-butyl-1H-pyrazole-3-carbonitrile (**3k**).
